# Supplementary material
Source: PubMed Central journal article supplement (PMC6709504)
Supplement: AAC.00136-19-s0001.pdf [file AAC.00136-19-s0001.pdf]

## Supplementary Information

### **3-*O*-Methyl-alkylgallates inhibit fatty acid desaturation in *Mycobacterium tuberculosis***

Nidja Rehberg<sup>a</sup>, Edwin Omeje<sup>a</sup>, Sherif S. Ebada<sup>a, b</sup>, Lasse van Geelen<sup>a</sup>, Zhen Liu<sup>a</sup>, Parichat Sureechatchayan<sup>c</sup>, Matthias U. Kassack<sup>c</sup>, Thomas R. Ioerger<sup>d</sup>, Peter Proksch<sup>a\*</sup>, Rainer Kalscheuer<sup>a\*</sup>

<sup>a</sup> Institute of Pharmaceutical Biology and Biotechnology, Heinrich Heine University Düsseldorf, Universitätsstr. 1, 40225 Düsseldorf, Germany

<sup>b</sup> Department of Pharmacognosy, Faculty of Pharmacy, Ain-Shams University, 11566 Cairo, Egypt

<sup>c</sup> Institute of Pharmaceutical and Medicinal Chemistry, Heinrich Heine University Düsseldorf, Universitätsstr. 1, 40225 Düsseldorf, Germany

<sup>d</sup> Department of Computer Science, Texas A&M University, 710 Ross St., College Station, TX 77843, USA

\*Authors for correspondence:

(RK) Phone: +49 211 8114180. Email: [rainer.kalscheuer@hhu.de](mailto:rainer.kalscheuer@hhu.de)

(PP) Phone: +49 211 8114163. Email: [proksch@hhu.de](mailto:proksch@hhu.de)

**Table S1 Minimal inhibitory concentration (MIC) of all compounds** against *Staphylococcus aureus* (ATCC 25923), Methicillin-resistant *S. aureus* (MRSA, ATCC 700699), *Enterococcus faecalis* (ATCC 29212 and ATCC 51299), *Enterococcus faecium* (ATCC 35667) and Vancomycin-resistant *E. faecium* (VRE, ATCC 700221), and *Acinetobacter baumannii* (ATCC BAA-1605). Compounds were tested against *A. baumannii* in monotreatment and in combination with sublethal doses of colistin (COL, 0.31  $\mu$ M) or rifampicin (RIF, 2.5  $\mu$ M). MICs are shown in  $\mu$ M.

|           | <i>S. aureus</i> |             | <i>E. faecalis</i> |            | <i>E. faecium</i> |             | <i>A. baumannii</i> |                    |                    |
|-----------|------------------|-------------|--------------------|------------|-------------------|-------------|---------------------|--------------------|--------------------|
|           | ATCC 25923       | ATCC 700699 | ATCC 29212         | ATCC 51299 | ATCC 35667        | ATCC 700221 | ATCC BAA-1605       | ATCC BAA-1605, COL | ATCC BAA-1605, RIF |
| <b>1</b>  | > 100            | > 100       | > 100              | > 100      | > 100             | > 100       | > 100               | > 100              | > 100              |
| <b>2</b>  | > 100            | > 100       | > 100              | > 100      | > 100             | > 100       | > 100               | > 100              | > 100              |
| <b>3</b>  | > 100            | > 100       | > 100              | > 100      | > 100             | > 100       | > 100               | > 100              | > 100              |
| <b>4</b>  | > 100            | > 100       | > 100              | > 100      | > 100             | > 100       | > 100               | > 100              | > 100              |
| <b>5</b>  | > 100            | > 100       | > 100              | > 100      | > 100             | > 100       | > 100               | > 100              | > 100              |
| <b>6</b>  | > 100            | > 100       | > 100              | > 100      | > 100             | > 100       | > 100               | > 100              | > 100              |
| <b>7</b>  | > 100            | > 100       | > 100              | > 100      | > 100             | > 100       | > 100               | > 100              | > 100              |
| <b>8</b>  | > 100            | 50          | > 100              | > 100      | > 100             | > 100       | > 100               | > 100              | > 100              |
| <b>9</b>  | > 100            | > 100       | > 100              | > 100      | > 100             | > 100       | > 100               | > 100              | > 100              |
| <b>10</b> | > 100            | > 100       | > 100              | > 100      | > 100             | > 100       | > 100               | > 100              | > 100              |
| <b>11</b> | > 100            | 25          | > 100              | > 100      | > 100             | > 100       | > 100               | > 100              | > 100              |
| <b>12</b> | 25               | 25          | > 100              | > 100      | 25                | 100         | > 100               | > 100              | > 100              |
| <b>13</b> | > 100            | > 100       | > 100              | > 100      | > 100             | > 100       | > 100               | > 100              | > 100              |
| <b>14</b> | > 100            | > 100       | > 100              | > 100      | > 100             | > 100       | > 100               | > 100              | > 100              |
| <b>15</b> | > 100            | > 100       | > 100              | > 100      | > 100             | > 100       | > 100               | > 100              | > 100              |
| <b>16</b> | > 100            | > 100       | > 100              | > 100      | > 100             | > 100       | > 100               | > 100              | > 100              |
| <b>17</b> | > 100            | > 100       | > 100              | > 100      | > 100             | > 100       | > 100               | > 100              | > 100              |
| <b>18</b> | > 100            | 100         | > 100              | > 100      | > 100             | > 100       | > 100               | > 100              | > 100              |
| <b>19</b> | 100              | > 100       | > 100              | > 100      | > 100             | 100         | > 100               | > 100              | > 100              |

**Table S2 Cytotoxicity data of compounds 10, 11 and 12 against various human cancer cell lines.** The data indicate the concentration ( $\mu\text{M}$ ) reducing the cell growth by 50 % ( $\text{IC}_{50}$ ) relative to the DMSO control. Cell lines and tissue origins are given. A concentration  $>100 \mu\text{M}$  indicates no cytotoxic effects in this assay up to the highest tested concentration. For quantification, the resazurin dye reduction assay has been used.

| Cell line | Origin                  | Compound 10 | Compound 11 | Compound 12 |
|-----------|-------------------------|-------------|-------------|-------------|
| HepG2     | Human liver carcinoma   | 100         | $> 100$     | $> 100$     |
| CLS-54    | Human lung carcinoma    | $> 100$     | $> 100$     | $> 100$     |
| HEK293    | Human embryonic kidney  | $> 100$     | $> 100$     | $> 100$     |
| H4        | Human brain neuroglioma | $> 100$     | $> 100$     | $> 100$     |
| HUH7      | Human liver carcinoma   | $> 100$     | $> 100$     | 100         |

**Table S3 Checkerboard synergy assay.** *M. tuberculosis* H37Rv cells were inoculated at a concentration of 10<sup>6</sup> CFU/mL. Growth of bacteria was determined after 5 days via resazurin dye reduction assay. Table shows growth of bacteria as percent of controls. Growth below 10% relative to controls is marked in blue, growth greater than 10% is marked in purple. Wells relevant for FICI calculation are marked in red. RIF, rifampicin; INH, isoniazid; DELA, delamanid.

**3-O-Methyl-butylgallate (µM)**

| RIF (µM) | 50    | 25    | 12.5  | 6.25   | 3.125  | 1.563  | 0.781  | 0.391  | 0.195  | 0.098  | 0.049  | 0      |
|----------|-------|-------|-------|--------|--------|--------|--------|--------|--------|--------|--------|--------|
| 1.250    | -6.41 | -2.97 | -4.10 | -3.10  | -4.16  | -4.50  | -3.39  | -2.59  | -2.44  | -2.38  | -2.47  | 2.19   |
| 0.625    | -2.96 | -7.35 | -8.81 | -8.02  | -7.48  | -5.82  | -7.39  | -6.72  | -7.81  | -7.22  | -7.24  | -0.82  |
| 0.313    | -1.21 | -6.97 | -6.92 | -6.27  | -4.77  | -7.45  | -4.65  | -4.04  | -4.29  | -4.63  | -3.75  | -0.94  |
| 0.156    | -0.70 | -5.69 | -5.37 | -4.96  | -4.48  | -4.12  | -2.71  | -2.60  | -2.56  | -3.18  | -3.05  | 27.69  |
| 0.078    | 0.31  | -6.57 | -5.69 | -1.18  | 5.60   | 6.07   | 8.37   | 11.62  | 13.01  | 13.86  | 16.26  | 104.23 |
| 0.039    | 1.23  | -5.17 | -3.97 | 19.93  | 63.88  | 62.61  | 61.94  | 72.48  | 73.73  | 73.77  | 71.27  | 124.33 |
| 0.020    | 1.52  | -3.89 | -1.01 | 79.33  | 107.65 | 110.90 | 116.87 | 121.26 | 116.72 | 116.82 | 116.37 | 77.79  |
| 0        | 1.80  | -2.47 | 10.83 | 128.04 | 163.76 | 169.69 | 163.33 | 172.47 | 176.96 | 161.40 | 149.05 | 100.00 |

| INH (µM) | 50    | 25    | 12.5  | 6.25  | 3.125 | 1.563 | 0.781  | 0.391 | 0.195 | 0.098 | 0.049  | 0      |
|----------|-------|-------|-------|-------|-------|-------|--------|-------|-------|-------|--------|--------|
| 5.000    | 35.14 | 30.26 | 22.49 | 22.39 | 21.33 | 22.69 | 20.26  | 21.56 | 15.79 | 21.41 | 15.80  | 20.07  |
| 2.500    | 29.95 | 13.39 | 14.12 | 15.57 | 19.31 | 17.27 | 16.63  | 16.81 | 14.31 | 14.52 | 14.28  | 18.49  |
| 1.250    | 26.68 | 9.49  | 11.72 | 13.95 | 13.80 | 17.84 | 17.86  | 17.63 | 17.00 | 13.78 | 15.79  | 21.10  |
| 0.625    | 17.61 | 8.03  | 10.64 | 13.08 | 15.09 | 15.89 | 14.99  | 16.19 | 12.95 | 13.01 | 12.49  | 17.33  |
| 0.313    | 11.49 | 4.90  | 8.31  | 11.18 | 14.14 | 14.07 | 15.39  | 18.66 | 15.13 | 13.22 | 12.52  | 73.44  |
| 0.156    | 1.56  | 2.35  | 9.33  | 14.42 | 17.06 | 19.25 | 19.36  | 19.48 | 21.77 | 19.32 | 20.83  | 108.83 |
| 0.078    | -1.10 | -1.49 | 11.79 | 63.87 | 86.98 | 91.45 | 101.14 | 68.20 | 94.93 | 78.84 | 103.20 | 97.93  |
| 0        | -0.85 | -0.46 | 7.66  | 80.32 | 91.13 | 96.20 | 98.19  | 93.29 | 98.04 | 94.67 | 97.08  | 100.00 |

| DELA (µM) | 50    | 25    | 12.5  | 6.25  | 3.125 | 1.563 | 0.781 | 0.391 | 0.195 | 0.098 | 0.049 | 0      |
|-----------|-------|-------|-------|-------|-------|-------|-------|-------|-------|-------|-------|--------|
| 2.340     | -0.43 | -4.86 | -2.42 | -2.34 | -2.22 | -2.03 | -1.42 | -3.77 | -1.15 | -0.21 | 0.94  | 5.04   |
| 1.170     | 2.39  | 0.5   | 1.00  | 0.79  | 0.28  | 1.68  | 1.24  | 0.92  | 3.25  | 2.40  | 2.15  | 6.40   |
| 0.585     | 1.53  | -0.35 | 3.10  | -0.10 | 1.24  | 0.77  | 1.01  | 0.80  | 1.37  | 1.40  | 2.57  | 8.91   |
| 0.293     | -0.42 | -2.35 | -1.78 | -0.57 | 0.81  | -1.53 | 1.60  | 2.55  | 3.72  | 3.31  | 4.08  | 25.12  |
| 0.146     | -0.61 | -2.60 | -1.87 | 2.70  | 8.45  | 11.56 | 10.27 | 14.65 | 18.82 | 17.12 | 13.89 | 55.16  |
| 0.073     | -0.57 | -2.40 | 0.76  | 14.66 | 48.45 | 48.71 | 53.63 | 52.31 | 47.36 | 50.49 | 48.05 | 66.45  |
| 0.037     | 0.06  | 0.22  | 0.94  | 61.34 | 71.63 | 89.27 | 69.22 | 70.47 | 59.91 | 65.13 | 69.98 | 79.24  |
| 0         | -1.96 | -2.23 | -0.65 | 72.89 | 87.48 | 83.74 | 90.04 | 87.87 | 85.14 | 85.98 | 83.55 | 100.00 |

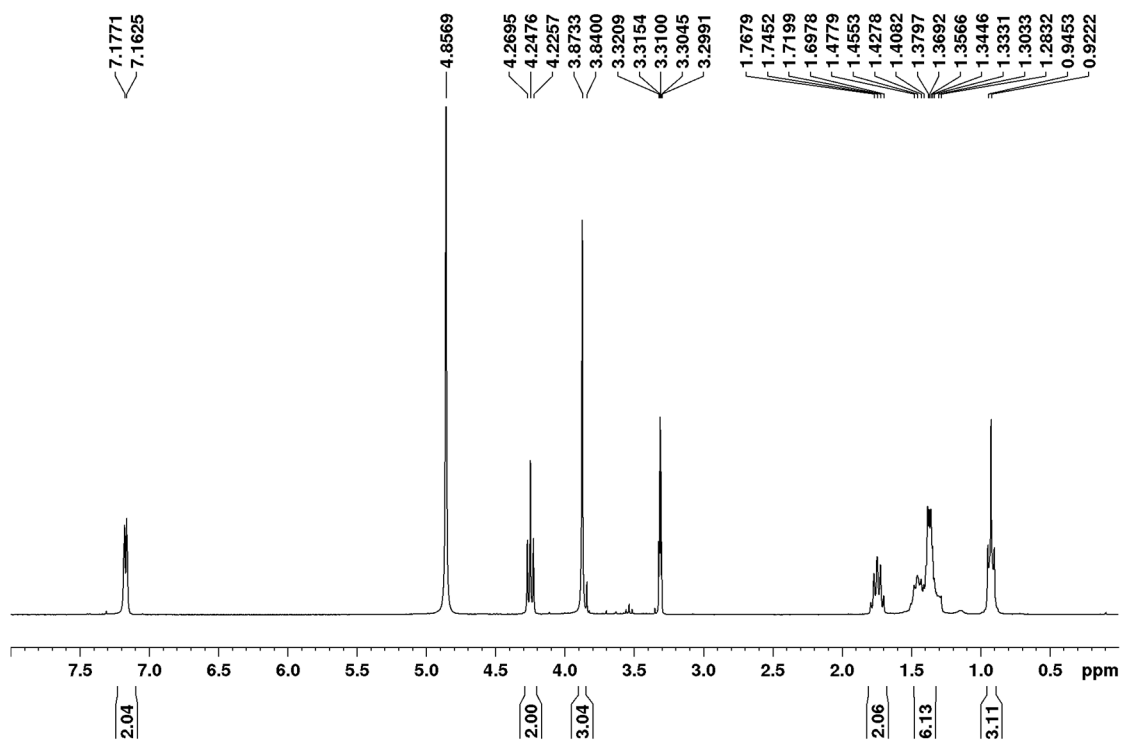

Figure S1  $^1\text{H}$  NMR spectrum (CD $_3$ OD, 300 MHz) of compound 11.

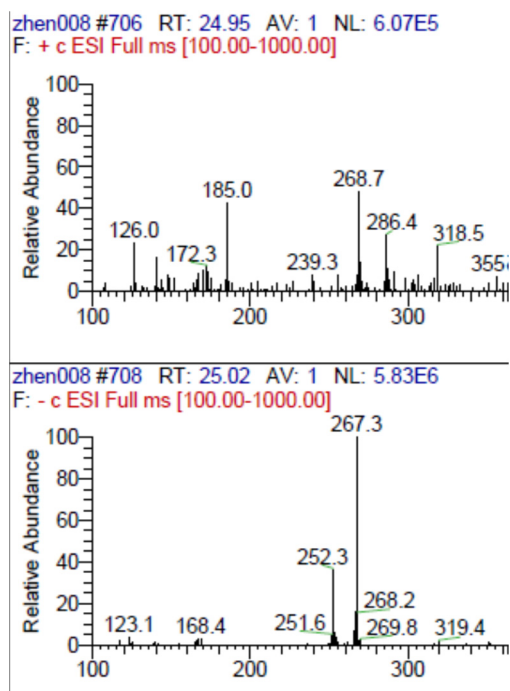

Figure S2 MS spectra of compound 11.

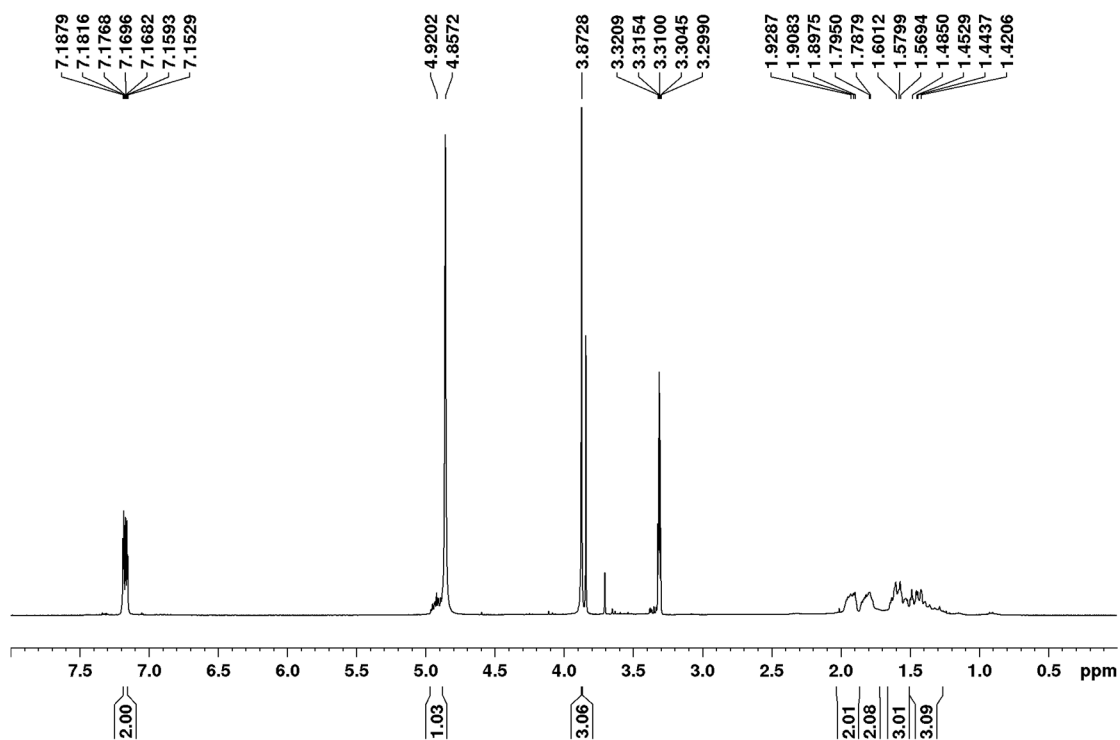

Figure S3  $^1\text{H}$  NMR spectrum (CD $_3$ OD, 300 MHz) of compound 13.

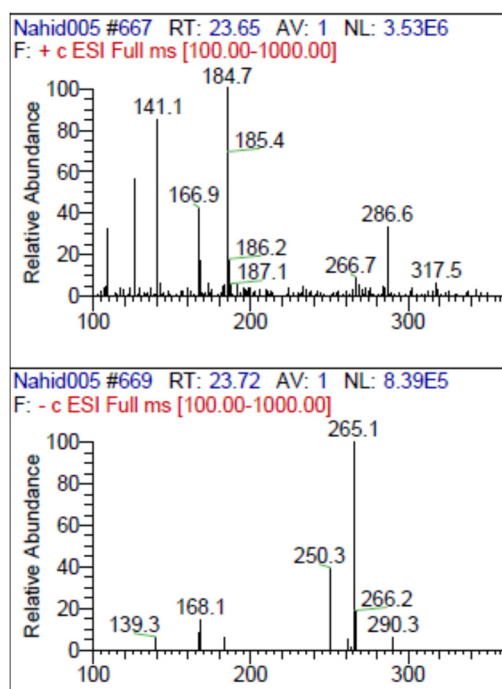

Figure S4 MS spectra of compound 13.

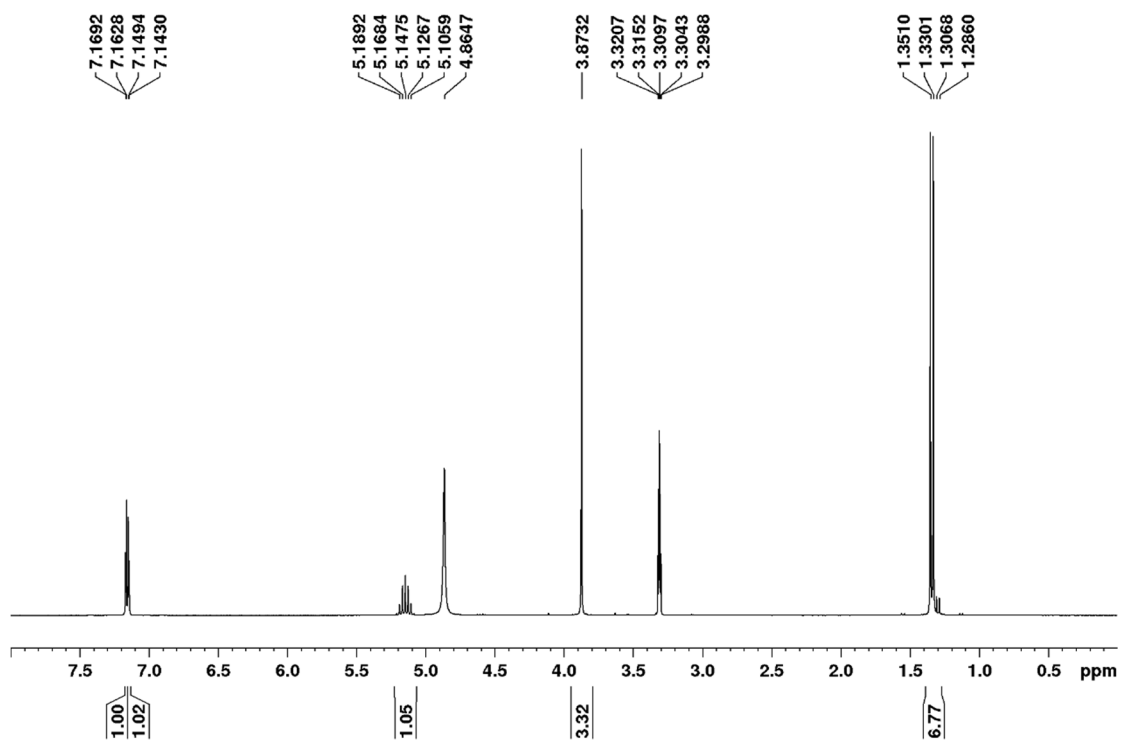

Figure S5  $^1\text{H}$  NMR spectrum (CD<sub>3</sub>OD, 300 MHz) of compound 15.

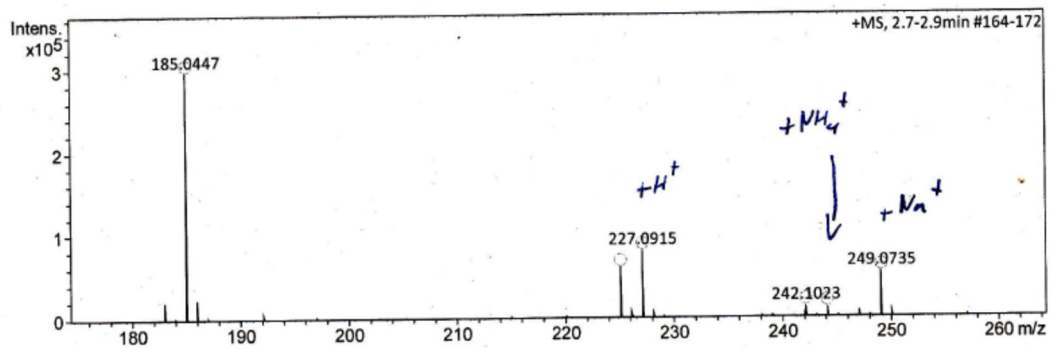

Figure S6 MS spectrum of compound 15.

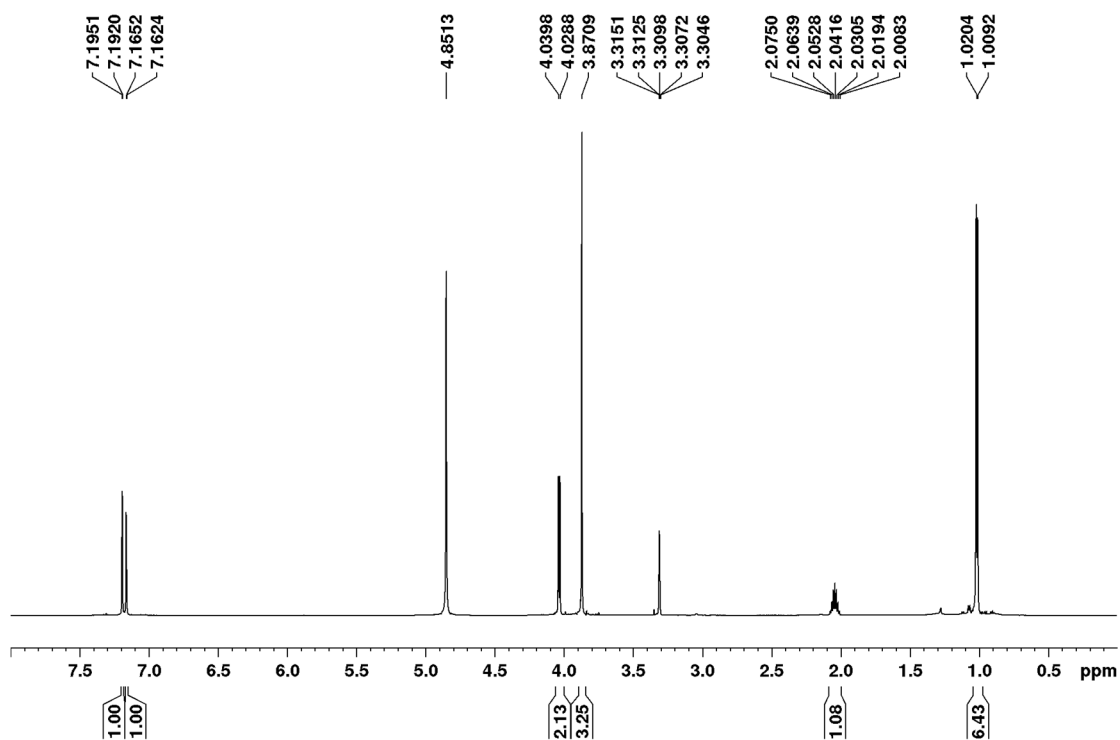

Figure S7  $^1\text{H}$  NMR spectrum (CD $_3$ OD, 300 MHz) of compound 16.

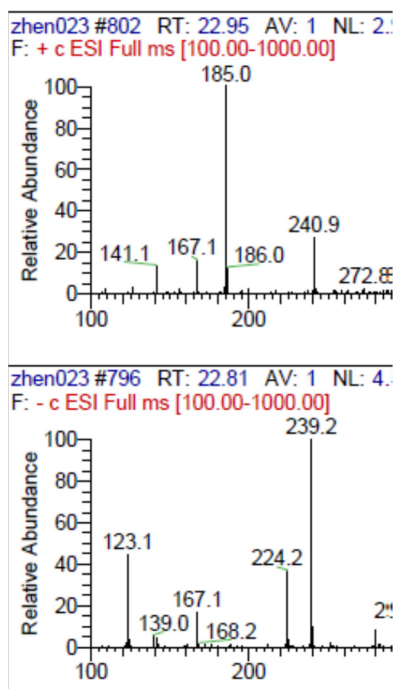

Figure S8 MS spectra of compound 16.



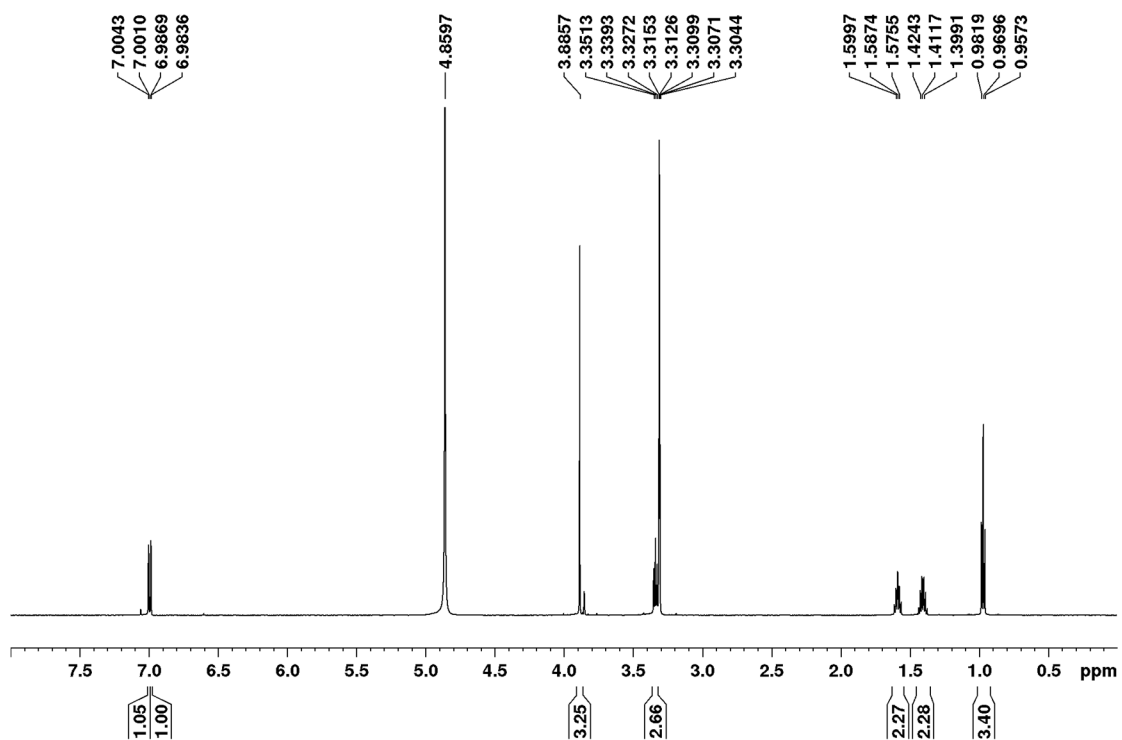

Figure S9  $^1\text{H}$  NMR spectrum ( $\text{CD}_3\text{OD}$ , 300 MHz) of compound 17.

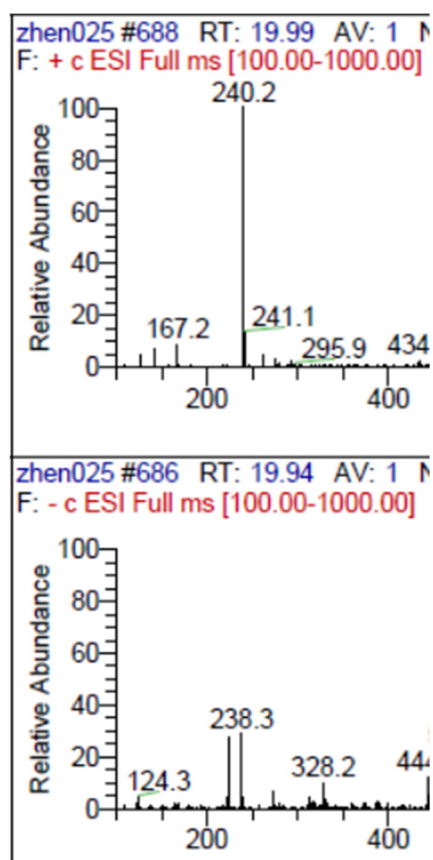

Figure S10 MS spectra of compound 17.

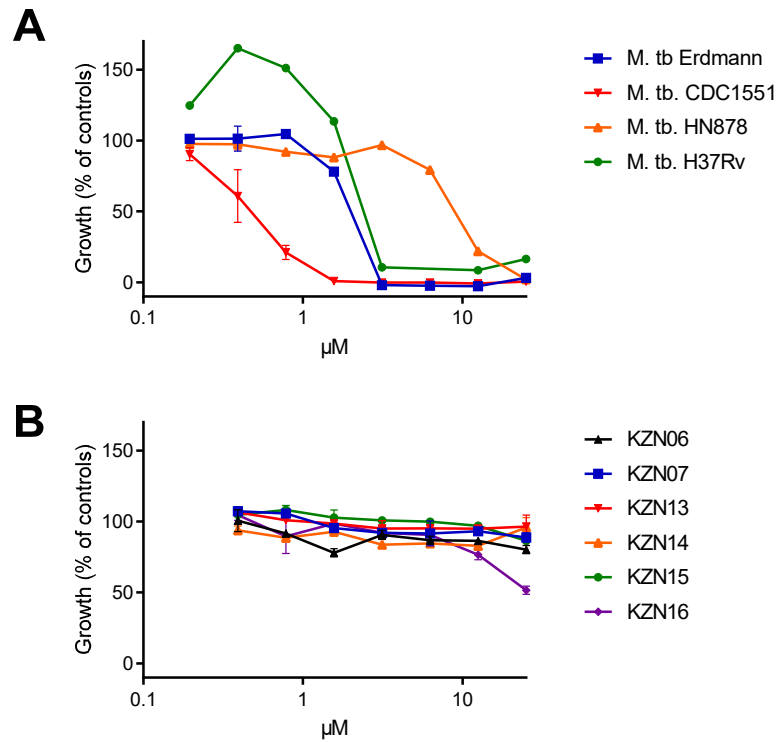

**Figure S11** Sensitivity towards 3-*O*-methyl-butylgallate of drug-sensitive (A) and extensively drug-resistant (XDR) (B) clinical isolates of *M. tuberculosis*. Growth was quantified using the resazurin dye reduction assay. Data represent single measurements.

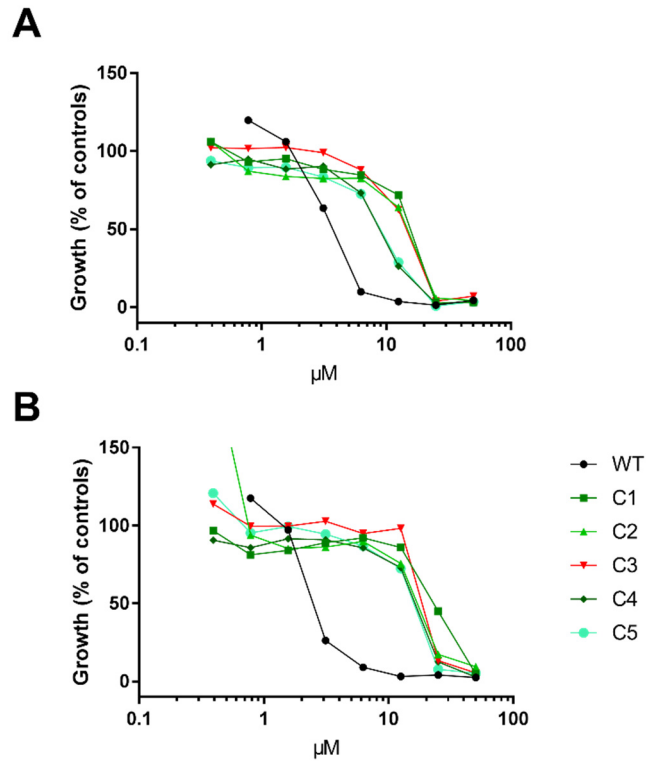

**Figure S12** Cross resistance of spontaneous resistant *M. tuberculosis* mutants (C1-C5) generated with 3-*O*-methyl-butylgallate against 3-*O*-methyl-hexylgallate (A) and 3-*O*-methyl-octylgallate (B) in comparison to *M. tuberculosis* H37Rv WT. Growth was quantified using the resazurin dye reduction assay. Data represent single measurements.

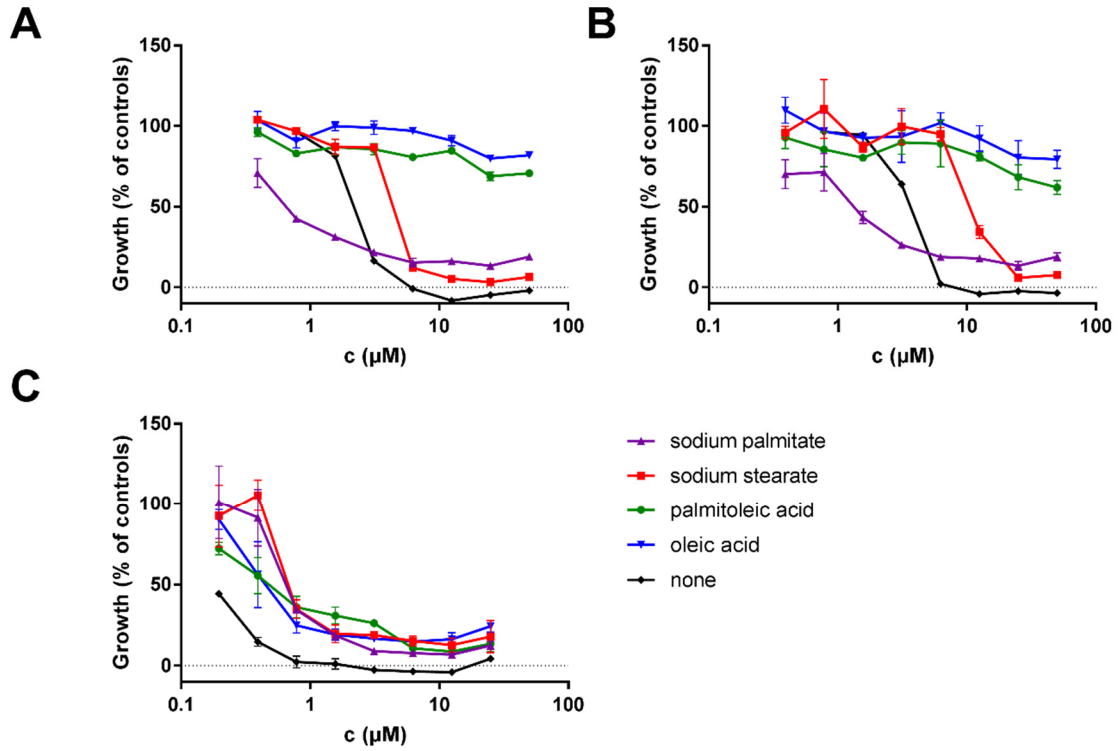

**Figure S13** Dose-response curves of 3-*O*-methyl-hexylgallate (A), 3-*O*-methyl-octylgallate (B) and isoxyl (C) against *M. tuberculosis* H37Rv during supplementation with sodium palmitate (triangle), sodium stearate (square), palmitoleic acid (circle), oleic acid (reversed triangle) and none supplements (rhombus). Growth was quantified using the resazurin dye reduction assay. Data are means of triplicates  $\pm$  SD.
